# Supplementary material for: Combined Rapid (TUBEX) Test for Typhoid-Paratyphoid A Fever Based on Strong Anti-O12 Response: Design and Critical Assessment of Sensitivity
Source: PubMed Central journal article supplement (PMC3174194; doi:10.1371/journal.pone.0024743), 2011-09-15
Supplement: pone.0024743.s001.pdf [file pone.0024743.s001.pdf]

Table S1 Antibody activity of sera from culture-confirmed typhoid patients determined by various ELISA and TUBEX tests.

| Specimen no.                                 | Days of fever at sampling | ELISA IgM |       |       | ELISA IgG |       |       | TUBEX                 |     |                       |     |                       |                       |
|----------------------------------------------|---------------------------|-----------|-------|-------|-----------|-------|-------|-----------------------|-----|-----------------------|-----|-----------------------|-----------------------|
|                                              |                           | T-LPS     | P-LPS | M-LPS | T-LPS     | P-LPS | M-LPS | TF                    | bTF | PA                    | bPA | 12T                   | 12P                   |
| Group A1 ( $\leq 11$ days after fever onset) |                           |           |       |       |           |       |       |                       |     |                       |     |                       |                       |
| T33a                                         | 10                        | M         | H     | H     | L         | H     | M     | 7                     | 6   | 1                     | 1   | 7                     | 3                     |
| T35a                                         | 9                         | H         | H     | H     | H         | H     | H     | 5                     | ND  | 6                     | 0   | 7                     | 6                     |
| T39a                                         | 8                         | H         | M     | L     | H         | H     | H     | 3                     | ND  | 6                     | 0   | 8                     | 9                     |
| T45a                                         | 8                         | H         | M     | M     | H         | H     | H     | 6                     | ND  | 8                     | 0   | 7                     | 7                     |
| T53a                                         | 11                        | M         | M     | L     | H         | H     | H     | 2                     | ND  | 2                     | 0   | 6                     | 4                     |
| T55a                                         | 10                        | H         | H     | H     | H         | H     | H     | 6                     | ND  | 9                     | 0   | 8                     | 8                     |
| T59a                                         | 10                        | H         | H     | H     | L         | M     | M     | 5                     | ND  | 3                     | 0   | 5                     | 5                     |
| T67a                                         | 8                         | H         | M     | L     | H         | H     | H     | 5                     | ND  | 4                     | 0   | 4                     | 5                     |
| T69a                                         | 8                         | M         | M     | M     | H         | H     | H     | 4                     | 3   | 7                     | 0   | 4                     | 6                     |
| T73a                                         | 8                         | M         | L     | -     | H         | H     | H     | 3                     | ND  | 7                     | 0   | 6                     | 5                     |
| Group A1 sensitivity                         |                           |           |       |       |           |       |       | 9/10<br><b>90.0%</b>  |     | 8/10<br><b>80.0%</b>  |     | 10/10<br><b>100%</b>  | 10/10<br><b>100%</b>  |
| Group A2 ( $\geq 17$ days after fever onset) |                           |           |       |       |           |       |       |                       |     |                       |     |                       |                       |
| T33b                                         | 19                        | M         | M     | M     | L         | M     | M     | 6                     | ND  | 0                     | 0   | 5                     | 2                     |
| T35b                                         | 22                        | H         | H     | H     | H         | H     | H     | 7                     | ND  | 8                     | 0   | 9                     | 8                     |
| T37a                                         | 24                        | H         | H     | H     | H         | H     | H     | 6                     | ND  | 2                     | 0   | 8                     | 5                     |
| T37b                                         | 28                        | H         | H     | M     | H         | H     | H     | 5                     | 5   | 2                     | 0   | 8                     | 5                     |
| T39b                                         | 21                        | H         | M     | L     | H         | H     | H     | 4                     | 5   | 8                     | 0   | 9                     | 9                     |
| T45b                                         | 23                        | H         | H     | M     | H         | H     | H     | 5                     | ND  | 8                     | 0   | 8                     | 8                     |
| T53b                                         | 23                        | H         | H     | M     | H         | H     | H     | 4                     | 4   | 4                     | 0   | 8                     | 9                     |
| T55b                                         | 20                        | H         | H     | H     | H         | H     | H     | 6                     | ND  | 8                     | 0   | 8                     | 7                     |
| T57b                                         | 20                        | H         | H     | M     | M         | H     | H     | 4                     | 4   | 2                     | 0   | 6                     | 4                     |
| T59b                                         | 24                        | H         | H     | M     | M         | H     | M     | 4                     | 4   | 2                     | 0   | 6                     | 6                     |
| T61a                                         | 35                        | M         | M     | L     | H         | H     | H     | 6                     | 6   | 5                     | 0   | 8                     | 8                     |
| T61b                                         | 50                        | M         | M     | L     | H         | H     | H     | 4                     | ND  | 5                     | 0   | 8                     | 8                     |
| T65b                                         | 21                        | H         | H     | M     | M         | L     | -     | 3                     | ND  | 1                     | 0   | 4                     | 4                     |
| T67b                                         | 19                        | H         | H     | M     | H         | H     | H     | 6                     | ND  | 8                     | 0   | 7                     | 8                     |
| T69b                                         | 22                        | M         | M     | L     | H         | H     | H     | 4                     | 2   | 7                     | 0   | 4                     | 5                     |
| T71b                                         | 30                        | M         | M     | L     | H         | H     | H     | 1                     | ND  | 1                     | 0   | 2                     | 3                     |
| T73b                                         | 17                        | M         | -     | -     | H         | H     | H     | 3                     | ND  | 8                     | 0   | 8                     | 5                     |
| Group A2 sensitivity                         |                           |           |       |       |           |       |       | 16/17<br><b>94.1%</b> |     | 10/17<br><b>58.8%</b> |     | 16/17<br><b>94.1%</b> | 16/17<br><b>94.1%</b> |

|                                   |    |   |   |   |   |   |   |   |              |   |              |   |              |              |
|-----------------------------------|----|---|---|---|---|---|---|---|--------------|---|--------------|---|--------------|--------------|
| Combined Group A sensitivity      |    |   |   |   |   |   |   |   | 25/27        |   | 18/27        |   | 26/27        | 26/27        |
|                                   |    |   |   |   |   |   |   |   | <b>92.6%</b> |   | <b>66.7%</b> |   | <b>96.3%</b> | <b>96.3%</b> |
| Group B                           |    |   |   |   |   |   |   |   |              |   |              |   |              |              |
| T31a                              | 8  | H | H | M | - | - | - | 4 | ND           | 1 | 1            | 4 | 4            |              |
| T31b                              | 23 | M | H | M | - | L | - | 5 | ND           | 0 | 0            | 5 | 3            |              |
| T41a                              | 24 | H | H | H | - | - | - | 6 | ND           | 0 | 0            | 7 | 6            |              |
| T57a                              | 8  | H | M | L | - | M | M | 3 | ND           | 0 | 0            | 5 | 1            |              |
| T63a                              | 8  | H | H | M | - | - | L | 6 | ND           | 1 | 0            | 7 | 2            |              |
| T63b                              | 22 | M | H | M | - | L | L | 5 | ND           | 0 | 0            | 7 | 4            |              |
| T65a                              | 10 | H | H | M | L | - | - | 3 | ND           | 1 | 0            | 4 | 4            |              |
| Group B sensitivity               |    |   |   |   |   |   |   |   | 7/7          |   | 0/7          |   | 7/7          | 5/7          |
|                                   |    |   |   |   |   |   |   |   | <b>100%</b>  |   | <b>0%</b>    |   | <b>100%</b>  | <b>71.4%</b> |
| Group C                           |    |   |   |   |   |   |   |   |              |   |              |   |              |              |
| T41b                              | 38 | - | - | L | - | - | - | 1 | ND           | 0 | 0            | 1 | 0            |              |
| T43a                              | 9  | - | - | - | - | - | - | 2 | ND           | 1 | 0            | 0 | 0            |              |
| T43b                              | 21 | - | - | - | - | - | - | 1 | ND           | 0 | 0            | 0 | 0            |              |
| T49a                              | 7  | - | - | - | - | - | - | 1 | ND           | 1 | 0            | 2 | 0            |              |
| T49b                              | 23 | - | - | - | - | - | - | 2 | ND           | 1 | 0            | 3 | 0            |              |
| T51a                              | 8  | - | - | - | - | - | - | 1 | ND           | 0 | 0            | 2 | 0            |              |
| T51b                              | 21 | - | - | - | - | - | - | 0 | ND           | 0 | 0            | 1 | 0            |              |
| Group C sensitivity               |    |   |   |   |   |   |   |   | 0/7          |   | 0/7          |   | 1/7          | 0/7          |
|                                   |    |   |   |   |   |   |   |   | <b>0%</b>    |   | <b>0%</b>    |   | <b>14.3%</b> | <b>0%</b>    |
| Group D                           |    |   |   |   |   |   |   |   |              |   |              |   |              |              |
| T47a                              | 9  | - | M | - | H | H | H | 2 | ND           | 6 | 0            | 6 | 8            |              |
| T47b                              | 22 | - | M | L | H | H | H | 4 | 2            | 7 | 0            | 8 | 9            |              |
| T71a                              | 7  | - | L | - | H | H | H | 0 | ND           | 0 | 0            | 1 | 2            |              |
| Group D sensitivity               |    |   |   |   |   |   |   |   | 1/3          |   | 2/3          |   | 2/3          | 2/3          |
|                                   |    |   |   |   |   |   |   |   | <b>33.3%</b> |   | <b>66.7%</b> |   | <b>66.7%</b> | <b>66.7%</b> |
| Group (A + B) sensitivity         |    |   |   |   |   |   |   |   | 32/34        |   | 18/34        |   | 33/34        | 31/34        |
|                                   |    |   |   |   |   |   |   |   | <b>94.1%</b> |   | <b>52.9%</b> |   | <b>97.1%</b> | <b>91.2%</b> |
| Group (A + B + C) sensitivity     |    |   |   |   |   |   |   |   | 32/41        |   | 18/41        |   | 34/41        | 31/41        |
|                                   |    |   |   |   |   |   |   |   | <b>78.0%</b> |   | <b>43.9%</b> |   | <b>82.9%</b> | <b>75.6%</b> |
| Group (A + B + C + D) sensitivity |    |   |   |   |   |   |   |   | 33/44        |   | 20/44        |   | 36/44        | 33/44        |
|                                   |    |   |   |   |   |   |   |   | <b>75.0%</b> |   | <b>45.5%</b> |   | <b>81.8%</b> | <b>75.0%</b> |

Results expressed as ELISA grades (-, negative; L, low; M, moderate; H, high antibody levels) or TUBEX scores (0-to-10, most negative-to-most positive). Specimen 'a' and (shaded) 'b' denote 1<sup>st</sup> and 2<sup>nd</sup> specimen, respectively, from same individual; T-LPS, P-LPS and M-LPS denote LPS from *S. Typhi*, *S. Paratyphi A* and *S. Typhimurium*, respectively; bTF is TUBEX TF with added soluble *S. Paratyphi A* LPS (blocker); bPA is TUBEX PA with added soluble *S. Typhi* LPS (blocker); ND = not done.
