# Supplementary material for: Combined Rapid (TUBEX) Test for Typhoid-Paratyphoid A Fever Based on Strong Anti-O12 Response: Design and Critical Assessment of Sensitivity
Source: PubMed Central journal article supplement (PMC3174194; doi:10.1371/journal.pone.0024743), 2011-09-15
Supplement: pone.0024743.s002.pdf [file pone.0024743.s002.pdf]

Table S2 Antibody activity of sera from culture-confirmed paratyphoid A patients determined by various ELISA and TUBEX tests.

| Specimen no.                 | ELISA IgM |       |       | ELISA IgG |       |       | TUBEX               |                      |                       |
|------------------------------|-----------|-------|-------|-----------|-------|-------|---------------------|----------------------|-----------------------|
|                              | T-LPS     | P-LPS | M-LPS | T-LPS     | P-LPS | M-LPS | TF                  | PA                   | 12P                   |
| Group A1 (obtained in 2006)  |           |       |       |           |       |       |                     |                      |                       |
| P01                          | M         | M     | L     | M         | H     | H     | ND                  | 6                    | 8                     |
| P02                          | -         | L     | -     | L         | H     | M     | ND                  | 0                    | 4                     |
| P06                          | -         | L     | -     | L         | H     | M     | ND                  | 0                    | 3                     |
| P08                          | -         | L     | -     | L         | H     | -     | ND                  | 1                    | 5                     |
| P09                          | -         | L     | M     | M         | M     | M     | ND                  | 0                    | 0                     |
| P12                          | -         | L     | -     | M         | H     | H     | ND                  | 1                    | 8                     |
| P16                          | -         | L     | -     | H         | H     | M     | ND                  | 0                    | 1                     |
| P19                          | H         | H     | H     | H         | H     | H     | ND                  | 6                    | 9                     |
| P24                          | -         | L     | -     | -         | L     | -     | ND                  | 0                    | 0                     |
| Group A1 sensitivity         |           |       |       |           |       |       |                     | 2/9<br><b>22.2%</b>  | 6/9<br><b>66.7%</b>   |
| Group A2 (obtained in 2009)  |           |       |       |           |       |       |                     |                      |                       |
| P25                          | M         | H     | L     | H         | H     | H     | 6                   | 4                    | 6                     |
| P27                          | M         | H     | H     | H         | H     | H     | 4                   | 8                    | 9                     |
| P28                          | -         | M     | -     | L         | H     | H     | 2                   | 0                    | 6                     |
| P30                          | M         | H     | M     | H         | H     | H     | 7                   | 10                   | 9                     |
| P33                          | -         | M     | -     | H         | H     | H     | 0                   | 6                    | 8                     |
| P36                          | L         | H     | -     | H         | H     | H     | 0                   | 3                    | 6                     |
| Group A2 sensitivity         |           |       |       |           |       |       | 3/6<br><b>50.0%</b> | 5/6<br><b>83.3%</b>  | 6/6<br><b>100%</b>    |
| Combined Group A sensitivity |           |       |       |           |       |       | 3/6<br><b>50.0%</b> | 7/15<br><b>46.7%</b> | 12/15<br><b>80.0%</b> |
| Group B                      |           |       |       |           |       |       |                     |                      |                       |
| P04                          | -         | L     | L     | -         | -     | M     | ND                  | 0                    | 0                     |
| Group B sensitivity          |           |       |       |           |       |       |                     | 0/1<br><b>0%</b>     | 0/1<br><b>0%</b>      |
| Group C                      |           |       |       |           |       |       |                     |                      |                       |
| P05                          | -         | -     | -     | -         | -     | -     | ND                  | 0                    | 0                     |
| P10                          | -         | -     | -     | -         | -     | -     | ND                  | 1                    | 4                     |
| P31                          | -         | -     | -     | -         | -     | -     | 0                   | 0                    | 0                     |
| P35                          | -         | -     | -     | -         | -     | -     | 0                   | 0                    | 0                     |

|                                   |   |   |   |   |   |   |                      |                       |                       |
|-----------------------------------|---|---|---|---|---|---|----------------------|-----------------------|-----------------------|
| Group C sensitivity               |   |   |   |   |   |   | 0/2<br><b>0%</b>     | 0/4<br><b>0%</b>      | 1/4<br><b>25.0%</b>   |
| Group D1 (2006)                   |   |   |   |   |   |   |                      |                       |                       |
| P03                               | - | - | - | M | H | H | ND                   | 2                     | 6                     |
| P07                               | - | - | - | - | M | H | ND                   | 0                     | 2                     |
| P11                               | - | - | - | M | H | H | ND                   | 0                     | 3                     |
| P13                               | - | - | - | - | H | H | ND                   | 0                     | 0                     |
| P14                               | - | - | - | L | H | H | ND                   | 7                     | 7                     |
| P15                               | - | - | L | L | L | - | ND                   | 0                     | 0                     |
| P17                               | - | - | - | H | H | H | ND                   | 0                     | 1                     |
| P20                               | - | - | - | - | M | M | ND                   | 0                     | 0                     |
| P21                               | - | - | - | M | M | H | ND                   | 0                     | 0                     |
| P22                               | - | - | - | L | L | M | ND                   | 0                     | 0                     |
| P23                               | - | - | - | - | H | H | ND                   | 0                     | 0                     |
| P18                               | - | - | - | H | H | H | ND                   | 4                     | 8                     |
| Group D1 sensitivity              |   |   |   |   |   |   |                      | 2/12<br><b>16.7%</b>  | 4/12<br><b>33.3%</b>  |
| Group D2 (2009)                   |   |   |   |   |   |   |                      |                       |                       |
| P26                               | - | - | - | M | H | H | 0                    | 0                     | 2                     |
| P29                               | - | - | - | H | H | H | 0                    | 0                     | 4                     |
| P32                               | - | - | - | M | M | M | 0                    | 0                     | 1                     |
| P34                               | M | - | - | H | H | H | 0                    | 5                     | 6                     |
| Group D2 sensitivity              |   |   |   |   |   |   | 0/4<br><b>0%</b>     | 1/4<br><b>25.0%</b>   | 2/4<br><b>50.0%</b>   |
| Combined Group D sensitivity      |   |   |   |   |   |   | 0/4<br><b>0%</b>     | 3/16<br><b>18.8%</b>  | 6/16<br><b>37.5%</b>  |
| Group (A + B) sensitivity         |   |   |   |   |   |   | 3/6<br><b>50.0%</b>  | 7/16<br><b>43.8%</b>  | 12/16<br><b>75.0%</b> |
| Group (A + B + C) sensitivity     |   |   |   |   |   |   | 3/8<br><b>37.5%</b>  | 7/20<br><b>35.0%</b>  | 13/20<br><b>65.0%</b> |
| Group (A + B + C + D) sensitivity |   |   |   |   |   |   | 3/12<br><b>25.0%</b> | 10/36<br><b>28.6%</b> | 19/36<br><b>52.8%</b> |

Results expressed as ELISA or TUBEX scores; notations as in Table S1.
