# Supplementary material for: Combined Rapid (TUBEX) Test for Typhoid-Paratyphoid A Fever Based on Strong Anti-O12 Response: Design and Critical Assessment of Sensitivity
Source: PubMed Central journal article supplement (PMC3174194; doi:10.1371/journal.pone.0024743), 2011-09-15
Supplement: pone.0024743.s003.pdf [file pone.0024743.s003.pdf]

Table S3 Comparison of assay performance among various TUBEX tests in the detection of (A) purified mAb P4E8, and (B) various typhoid and paratyphoid sera.

A

|             | Inhibiting mAb ( $\mu\text{g/ml}$ ) |                     |                     |                    |                    |
|-------------|-------------------------------------|---------------------|---------------------|--------------------|--------------------|
|             | 64 $\mu\text{g/ml}$                 | 32 $\mu\text{g/ml}$ | 16 $\mu\text{g/ml}$ | 8 $\mu\text{g/ml}$ | 0 $\mu\text{g/ml}$ |
| TUBEX 12TPP | 6                                   | 4                   | 2                   | 0                  | 0                  |
| TUBEX 12TP  | 6                                   | 4                   | 2                   | 0                  | 0                  |
| TUBEX 12T   | 6                                   | 4                   | 2                   | 0                  | 0                  |
| TUBEX12P    | 6                                   | 4                   | 2                   | 0                  | 0                  |

B

| Specimen no. | TUBEX |    |     |     |      |       |
|--------------|-------|----|-----|-----|------|-------|
|              | TF    | PA | 12T | 12P | 12TP | 12TPP |
| Typhoid:     |       |    |     |     |      |       |
| T35a         | 5     | 6  | 7   | 6   | 8    | ND    |
| T35b         | 7     | 8  | 9   | 8   | 9    | ND    |
| T35 (a+b)    | ND    | ND | ND  | ND  | ND   | 9     |
| T37a         | 6     | 2  | 8   | 5   | 7    | ND    |
| T37b         | 5     | 2  | 8   | 5   | 7    | ND    |
| T37 (a+b)    | ND    | ND | ND  | ND  | ND   | 6     |
| T57a         | 3     | 0  | 5   | 1   | 2    | ND    |
| T57b         | 4     | 2  | 6   | 4   | 6    | ND    |
| T57 (a+b)    | ND    | ND | ND  | ND  | ND   | 4     |
| T39b         | 4     | 8  | 9   | 9   | 9    | 9     |
| T45a         | 6     | 8  | 7   | 7   | 7    | 7     |
| T59b         | 4     | 2  | 6   | 6   | 7    | 7     |
| T67a         | 5     | 4  | 4   | 5   | 6    | 6     |
| Paratyphoid: |       |    |     |     |      |       |
| P01          | ND    | 6  | ND  | 8   | 6    | ND    |
| P12          | ND    | 1  | ND  | 8   | 4    | 6     |
| P19          | ND    | 6  | ND  | 9   | ND   | 7     |
| P36          | 0     | 3  | ND  | 6   | 6    | ND    |

Results expressed as TUBEX scores; (a+b) denotes equally-mixed proportions of 'a' and 'b' specimens; results in (B) for TUBEX TF, TUBEX PA, TUBEX 12T and TUBEX 12P, obtained previously (Table S1 and S2); ND, not done (insufficient specimen)
